# Supplementary material
Source: PubMed Central journal article supplement (PMC2293942)

**(a)**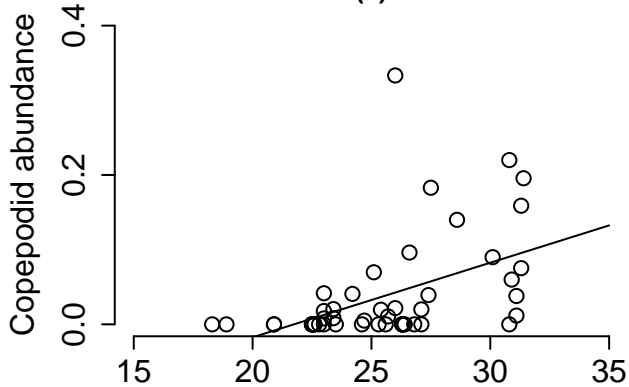**(b)**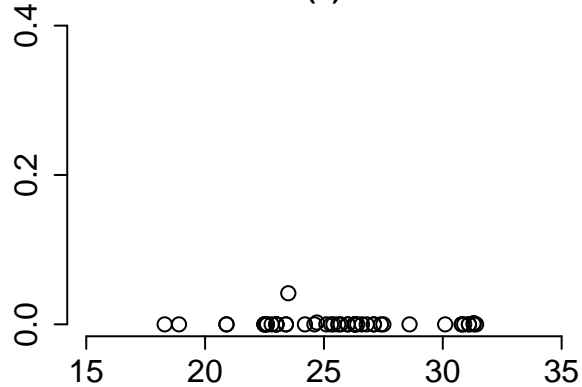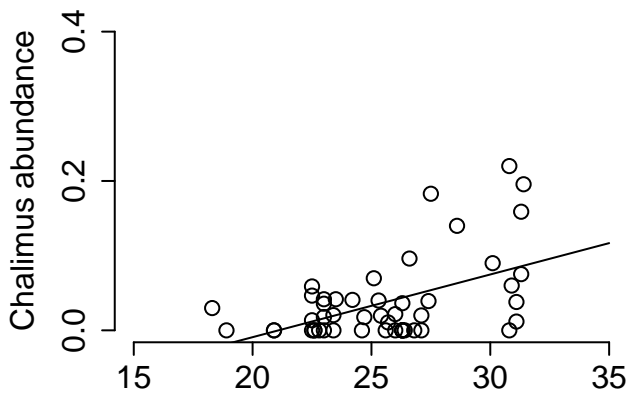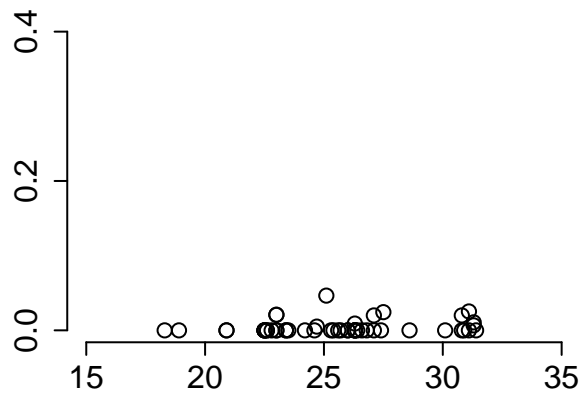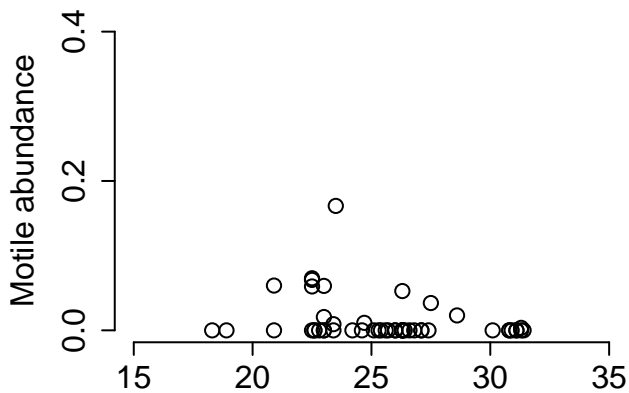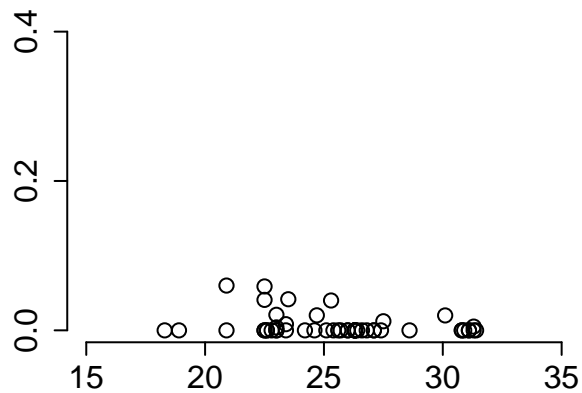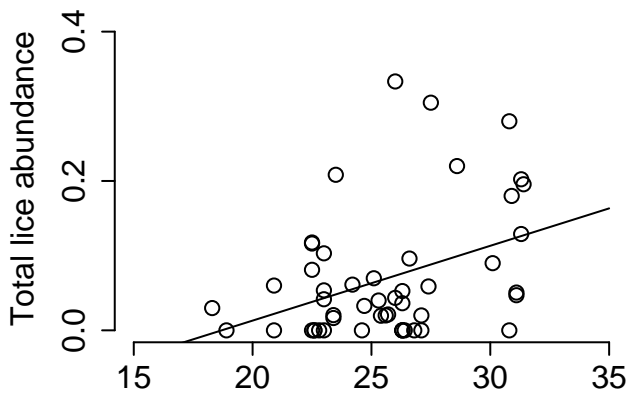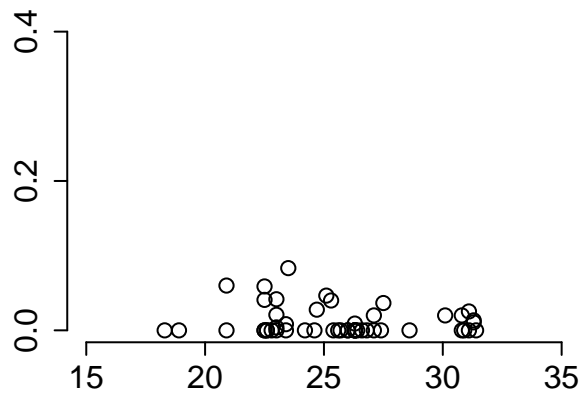

Salinity (ppt)

Salinity (ppt)

Supplement: rspb20071122s15.pdf [file rspb20071122s15.pdf]
